# Supplementary material for: A New Genotype of Feline Morbillivirus Infects Primary Cells of the Lung, Kidney, Brain and Peripheral Blood
Source: PubMed Central journal article supplement (PMC6410220; doi:10.3390/v11020146), 2019-02-09
Supplement: viruses-11-00146-s001.pdf [file viruses-11-00146-s001.pdf]

Supplementary Figure S1. Gating strategy used in flow cytometric analyses of PBMC.

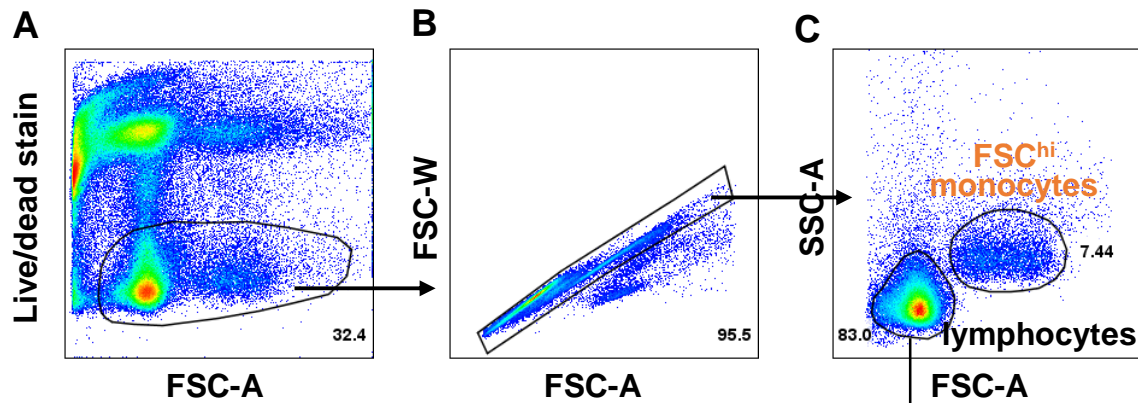

**D**

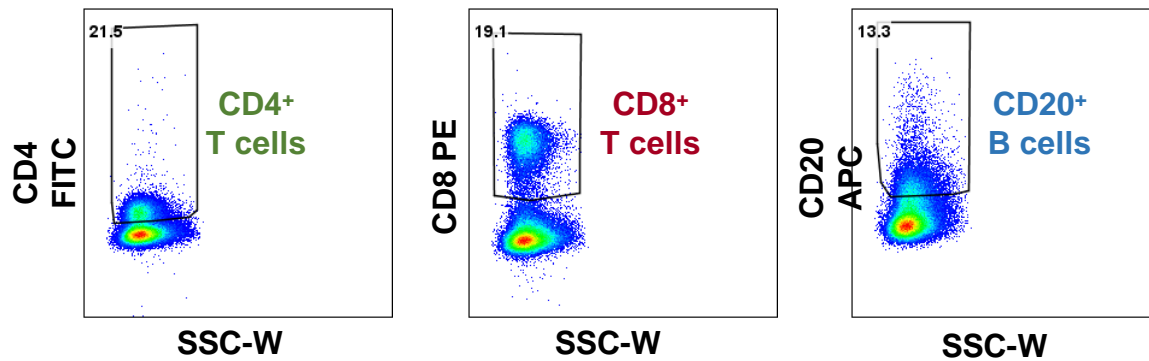

FMO controls

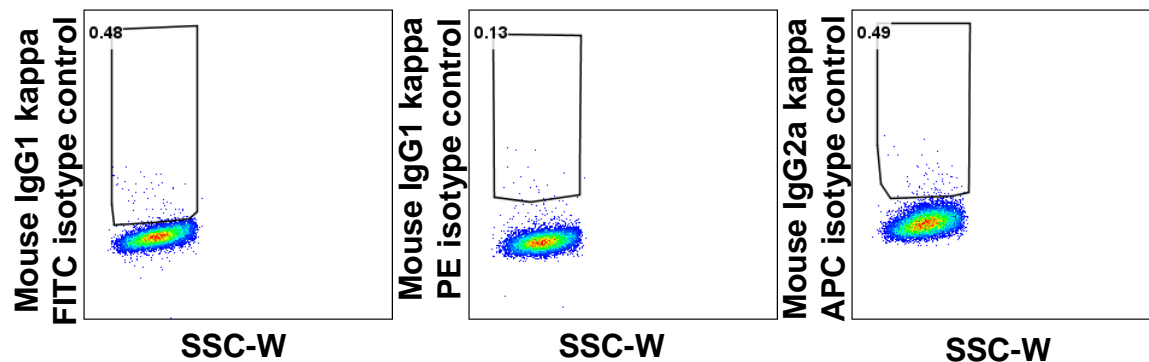

## **Legend to Figure S1: Gating strategy used in flow cytometric analyses of PBMC.**

Representative pseudocolor plots are shown. After exclusion of dead cells (**A**) and doublets (**B**), gating on lymphocytes and monocytes was performed according to their forward and side scattering (FSC/SSC) properties (**C**). (**D**) Among lymphocytes CD4<sup>+</sup> T cells, CD8<sup>+</sup> T cells and CD20<sup>+</sup> B cells (upper panel) were gated according to the appropriate Fluorescence-minus-one (FMO) controls (lower panel).

**Table S1.** Primer sequences used for the amplification of nearly whole genome sequences of FeMV-GT2 strains.

| Primer name           | Nucleotide sequence<br>(5' → 3')  | Size of PCR<br>fragment | Position<br>(GenBank Acc.-No.<br>MK182089) |
|-----------------------|-----------------------------------|-------------------------|--------------------------------------------|
| Gordon3'Ende400bpFor  | ACCAACCTCAGGAACCACCT              | 400 bp                  | 1 – 434                                    |
| Gordon3'Ende400bpRev  | ACCAGACAAAGATGTCTGTGACC           |                         |                                            |
| NP-Schmusi-For        | ATGTGAGTCTACTGAGGTCACCTTG         | 1560 bp                 | 108 – 1667                                 |
| NP-TV2-Rev            | GATTCAGAAGGTCAGTATCATTGTAATGG     |                         |                                            |
| Phospho-Gordon-For    | ATGTCAGCAGAACAATCCAACAAG          | 1500 bp                 | 1781 – 3256                                |
| Phospho-Gordon-Rev    | GTTATTATTCTTGATCAATATCATAACTTTCTC |                         |                                            |
| Gordon-InterReg3kbFor | TTGAGCAGGTAATGGTTCATTG            | 3000 bp                 | 3612 – 6894                                |
| GordonInterReg3kbRev  | CTTTCCTTTAGGCGTAGGG               |                         |                                            |
| Gordon-InterReg1kbFor | ATCGCACTGGAGTTTCTCTTG             | 1000 bp                 | 4581 – 5490                                |
| GordonInterReg1kbRev  | TTGCCACTCCAGTCTTACAGG             |                         |                                            |
| Gordon2000bp-For      | GTCGGTAAGCCAGGGTTGTA              | 2000 bp                 | 8335 – 10346                               |
| Gordon2000bp-Rev      | TGAAGTCATTGTCTGGGGATA             |                         |                                            |
| Gordon6200bp-For      | CAAGACCTATCCCAGGCAAA              | 6200 bp                 | 2384 – 8636                                |
| Gordon6200bp-Rev      | CCAATCCCAAAGTTGCTTGT              |                         |                                            |
| Gordon-InterReg5kbFor | TCCAAGTACCATTTCGCACAG             | 5000 bp                 | 3002 – 7761                                |
| GordonInterReg5kbRev  | CCGACCAAACATGTTGCTAA              |                         |                                            |
| HA-Gordon-For         | CAGCGGAAGGACTACTCTTAAT            | 1800 bp                 | 7138 – 8715                                |
| HA-Gordon-Rev         | ATTACAGTTTATTAAGTTGAAAATGGCAG     |                         |                                            |
| Gordon-PAR-For        | ATGCCTCCAATGGTGC                  | 1300 bp                 | 10044 – 11738                              |
| Gordon-HEN-Rev        | TGCAAGGACATGCAATTTTT              |                         |                                            |
| Gordon-Poly628bp-For  | TGCAAACTTCAGCCATCTG               | 630 bp                  | 12852 – 13460                              |
| Gordon-Poly628bp-Rev  | GAGTGGCACGCTATACAACAA             |                         |                                            |
| Gordon-Poly2100bp-For | AGCCTCGGATCAACTAGCAA              | 2100 bp                 | 11260 – 13361                              |
| Gordon-Poly2100bpRev  | AGCAATTGCAGTGACCAAAA              |                         |                                            |
| Gordon244bp-For       | GATCAATATTAAGATCCAGGTAGTCTT       | 250 bp                  | 15191 – 15433                              |
| Gordon244bp-Rev       | TACCCAGTCTTACATGAGAGTCAG          |                         |                                            |
| Gordon5'Ende800bpFor  | ACCAGACAAAGAAAGCTATAGGTCC         | 820 bp                  | 15229 – 16047                              |
| Gordon5'Ende800bpRev  | CAGGTGCATTGCATTGAAGT              |                         |                                            |
